# Supplementary material for: Environmental Correlates to Genetic Diversity and Structure in Invasive Apple Snail (Pomacea canaliculata) Populations in China
Source: MDPI journal article supplement (doi:10.3390/d15101048), 2023-09-28
Supplement: s1 [file s1]

**Table S1.** Mean water physicochemical parameters from six *P. canalicuata* populations in the Poyang Lake Basin collected October 2016 and January, May and August 2017. DO: dissolved oxygen concentration (mg/L), pH: concentration of hydrogen ions, TURB: turbidity (NTU), T: water temperature (°C), NH<sub>4</sub><sup>+</sup>: ammonium concentration (mg/L), NO<sub>3</sub><sup>-</sup>: nitrate concentration (mg/L), TDS: total dissolved solids (mg/L), Chl-a: chlorophyll-a concentration (units?), TP: total phosphorus (mg/L), TN: total nitrogen (mg/L). The value of all parameters were mean ± standard error.

|                                     | Gongshui River | Tao River | Shangyou River | Shushui River | Gan River | Xinjiang River |
|-------------------------------------|----------------|-----------|----------------|---------------|-----------|----------------|
| T(°C)                               | 22.8±6.7       | 22.6±6.5  | 23.5±7.1       | 18.8±5.5      | 23.5±7.3  | 21.9±6.7       |
| TDS(mg/L)                           | 72.5±1.5       | 128.5±9.7 | 47.0±1.2       | 33.7±1.4      | 69.3±1.5  | 69.9±12.3      |
| DO(mg/L)                            | 8.9±1.4        | 8.7±1.2   | 8.4±1.1        | 9.7±1.2       | 9.3±1.3   | 9.3±1.5        |
| TURB(NTU)                           | 16.0±0.3       | 9.9±0.2   | 36.0±0.2       | 5.8±0.3       | 12.3±0.1  | 11.3±0.2       |
| pH                                  | 6.4±0.1        | 6.3±0.2   | 6.3±0.2        | 6.3±0.2       | 6.3±0.3   | 6.9±0.1        |
| Chl-a(mg/L)                         | 25.4±0.2       | 6.3±0.3   | 34.9±0.2       | 16.2±0.2      | 20.3±0.5  | 15.7±0.2       |
| TN(mg/L)                            | 1.80±0.14      | 2.82±0.17 | 0.67±0.15      | 1.11±0.13     | 1.66±0.12 | 1.10±0.07      |
| NO <sub>3</sub> <sup>-</sup> (mg/L) | 1.05±0.09      | 2.54±0.07 | 0.41±0.08      | 0.64±0.05     | 1.34±0.10 | 0.98±0.07      |
| NH <sub>4</sub> <sup>+</sup> (mg/L) | 0.16±0.02      | 0.09±0.01 | 0.04±0.01      | 0.05±0.01     | 0.06±0.01 | 0.10±0.01      |
| TP(mg/L)                            | 0.22±0.01      | 0.12±0.02 | 0.14±0.02      | 0.18±0.02     | 0.19±0.02 | 0.10±0.01      |

**Table S2.** Analysis of genetic differentiation coefficient ( $F_{st}$ ) calculated using COI, 16S and COI+16S datasets among six populations of *P. canaliculata*. Bold type indicates statistical significance ( $p < 0.001$ ). GS: Gongshui River; TR: Tao River; SY: Shangyou River; SS: Shushui River; GR: Gan River; XR: Xinjiang River.

| <b>COI</b>          |               |                |                |               |               |    |
|---------------------|---------------|----------------|----------------|---------------|---------------|----|
|                     | GS            | TR             | SY             | SS            | GR            | XR |
| GS                  |               |                |                |               |               |    |
| TR                  | <b>0.7875</b> |                |                |               |               |    |
| SY                  | <b>0.0119</b> | <b>0.0962</b>  |                |               |               |    |
| SS                  | <b>0.4725</b> | <b>1.0000</b>  | <b>0.0132</b>  |               |               |    |
| GR                  | <b>0.1644</b> | <b>0.5768</b>  | <b>0.3133</b>  | <b>0.1148</b> |               |    |
| XR                  | <b>0.0001</b> | <b>0.0129</b>  | <b>0.0546</b>  | <b>0.0001</b> | <b>0.0440</b> |    |
| <b>16S rRNA</b>     |               |                |                |               |               |    |
| GS                  |               |                |                |               |               |    |
| TR                  | <b>1.0000</b> |                |                |               |               |    |
| SY                  | <b>1.0000</b> | <b>-1.0000</b> |                |               |               |    |
| SS                  | <b>0.6221</b> | <b>1.0000</b>  | <b>1.0000</b>  |               |               |    |
| GR                  | <b>1.0000</b> | <b>-1.0000</b> | <b>-1.0000</b> | <b>1.0000</b> |               |    |
| XR                  | <b>0</b>      | <b>0.0201</b>  | <b>0.0177</b>  | <b>0</b>      | <b>0.0012</b> |    |
| <b>COI+16S rRNA</b> |               |                |                |               |               |    |
| GS                  |               |                |                |               |               |    |
| TR                  | <b>0.6296</b> |                |                |               |               |    |
| SY                  | <b>0.0838</b> | <b>0.4554</b>  |                |               |               |    |
| SS                  | <b>0.6483</b> | <b>0.7782</b>  | <b>0.1893</b>  |               |               |    |
| GR                  | <b>0.7541</b> | <b>1.0000</b>  | <b>0.2313</b>  | <b>0.8586</b> |               |    |
| XR                  | <b>0</b>      | <b>0.0785</b>  | <b>0</b>       | <b>0</b>      | <b>0.0022</b> |    |

**Table S3.** Summary statistics for the first 4 axes of RDA performed between physicochemical parameters and genetic parameters.

| Correlation                                                    | First axis | Second axis | Third axis | Fourth axis |
|----------------------------------------------------------------|------------|-------------|------------|-------------|
| Eigenvalues                                                    | 0.842      | 0.138       | 0.020      | 0.000       |
| Cumulative percentage variance of species–environment relation | 84.2       | 98.0        | 100.0      | 100.0       |
